# Supplementary material for: Genetic Structure and Colonization of North America by Depressaria depressana (Fabricius 1775) (Lepidoptera: Depressariidae) over 15 Years; Contrasts with Westward Expansion of Depressaria radiella (Goeze, 1783) over 160 Years
Source: MDPI journal article supplement (doi:10.3390/insects13090789), 2022-08-31
Supplement: s1 [file s1]

Supplemental Table S1. All taxa, localities, BOLD IDs, and Genbank accession numbers used in this experiment.

| Species              | Continent     | Country     | BOLD ID      | Genbank Accession |
|----------------------|---------------|-------------|--------------|-------------------|
| <i>D. depressana</i> | Europe        | Austria     | DEEUR156-11  | KX042169          |
|                      | Europe        | Finland     | LEFIC152-10  | HM871998          |
|                      | Europe        | Finland     | LEFIA1090-10 | KF808477          |
|                      | Europe        | Switzerland | DEEUR049-11  | KX042319          |
|                      | Europe        | Norway      | LON2559-15   | -                 |
|                      | Europe        | Finland     | LEFIB563-10  | HM871445          |
|                      | Europe        | Finland     | LEFIB562-10  | HM871444          |
|                      | Europe        | Germany     | ODOPE583-11  | KX040162          |
|                      | North America | Canada      | RRINV3987-15 | KT707656          |
|                      | North America | Canada      | MNAK285-10   | HM887836          |
|                      | North America | Canada      | SMTPI8771-14 | KT143113          |
|                      | North America | Canada      | GBGL4976-08  | EU141359          |
|                      | North America | Canada      | GBGL26966-19 | KT713819          |
|                      | North America | Canada      | AGAKH078-17  | MG357416          |
|                      | North America | Canada      | SMTPS777-16  | MG360114          |
|                      | North America | Canada      | SMTPD1365-13 | KT139719          |
|                      | North America | Canada      | BARSH518-15  | -                 |
|                      | North America | Canada      | SMTPS599-16  | MG360553          |
|                      | North America | Canada      | BARSG267-16  | MG360136          |
|                      | North America | Canada      | BARSE545-16  | MG361914          |
|                      | North America | Canada      | BARSG259-16  | MG359965          |
|                      | North America | Canada      | ROUGE492-17  | -                 |
|                      | North America | Canada      | BARSD241-16  | -                 |
|                      | North America | Canada      | BARSC083-16  | -                 |
|                      | North America | Canada      | BARSI146-16  | -                 |
|                      | North America | Canada      | ELPCH679-17  | -                 |
|                      | North America | Canada      | MNAL583-10   | HQ965238          |
|                      | North America | Canada      | MNAN645-13   | KF808469          |
|                      | North America | Canada      | KSLEP022-14  | KT138246          |
|                      | North America | Canada      | KSLEP021-14  | KT146067          |
|                      | North America | Canada      | BARSM358-17  | MG360133          |
|                      | North America | Canada      | BARSM752-17  | MG361742          |
|                      | North America | Canada      | RRGCO536-15  | MG362426          |
|                      | North America | Canada      | BARSD227-16  | -                 |
| <i>D. radiella</i>   | Europe        | Austria     | DEEUR158-11  | KX042381          |
|                      | Europe        | Austria     | LEATJ1038-15 | -                 |
|                      | Europe        | Austria     | LEATC528-13  | KM573322          |
|                      | Europe        | Finland     | LEFIF849-10  | HM875532          |
|                      | Europe        | Finland     | LEFID175-10  | HM872982          |

---

|               |             |              |          |
|---------------|-------------|--------------|----------|
| Europe        | Germany     | FBLMU176-09  | HM391797 |
| Europe        | Germany     | FBLMU177-09  | HM391798 |
| Europe        | Germany     | FBLMU703-09  | HQ955266 |
| Europe        | Norway      | LEPVM100-12  | -        |
| Europe        | Norway      | LEPVM101-12  | -        |
| Europe        | Norway      | LON2555-15   | -        |
| Europe        | Russia      | DEEUR477-15  | MW201276 |
| Europe        | Switzerland | DEEUR045-11  | KX042373 |
| Europe        | UK          | CGUKA083-09  | -        |
| Europe        | UK          | CGUKC898-09  | -        |
| Europe        | UK          | CGUKD655-09  | KX044169 |
| Europe        | Croatia     | LON6919-18   | -        |
| Europe        | Finland     | LEFIF848-10  | HM875531 |
| Europe        | Finland     | LEFIB073-10  | HM870982 |
| Europe        | Norway      | GMNWK4200-14 | -        |
| Europe        | Norway      | GMNWL3227-14 | -        |
| Europe        | Norway      | GMNWK4187-14 | -        |
| North America | Canada      | LALPA1354-12 | KT127026 |
| North America | Canada      | LALPA1355-12 | KT138815 |
| North America | Canada      | LBCW061-08   | -        |
| North America | Canada      | MECB697-05   | GU096427 |
| North America | Canada      | MEC086-04    | GU095787 |
| North America | Canada      | RDLQD598-06  | -        |
| North America | Canada      | RDLQD599-06  | -        |
| North America | USA         | LNAUT2820-14 | -        |
| North America | USA         | EHL851-12    | -        |
| North America | USA         | RWWC908-12   | -        |
| North America | Canada      | SMTPM6085-15 | MG358908 |
| North America | Canada      | LOWCE394-06  | KT138914 |
| North America | Canada      | LOWCE442-06  | KT133300 |
| North America | Canada      | LOWCE437-06  | KT129541 |
| North America | Canada      | LOWCE397-06  | KT134163 |
| North America | Canada      | SMTPB5733-13 | KT131398 |
| North America | Canada      | MEC171-04    | GU095788 |
| North America | Canada      | MEC339-04    | GU095789 |
| North America | Canada      | RDLQD600-06  | -        |
| North America | USA         | LNAUT2821-14 | -        |
| North America | USA         | RWWC1236-13  | -        |
| North America | USA         | RWWC1336-14  | -        |
| North America | USA         | RWWC1331-14  | -        |

---
